# Supplementary material for: A Nontoxic Transduction Enhancer Enables Highly Efficient Lentiviral Transduction of Primary Murine T Cells and Hematopoietic Stem Cells
Source: PubMed Central journal article supplement — Mol Ther Methods Clin Dev. 2018 Aug 8;10:341–7. doi: 10.1016/j.omtm.2018.08.002 (PMC6125771; doi:10.1016/j.omtm.2018.08.002), 2018-08-08

OMTM, Volume 10

## **Supplemental Information**

### **A Nontoxic Transduction Enhancer Enables Highly Efficient Lentiviral Transduction of Primary Murine T Cells and Hematopoietic Stem Cells**

**Marianne Delville, Tayebah Soheili, Florence Bellier, Amandine Durand, Adeline Denis, Chantal Lagresle-Peyrou, Marina Cavazzana, Isabelle Andre-Schmutz, and Emmanuelle Six**

**Supplemental figures**

**Supplemental figure 1. Optimization of lentiviral gene transfer in CD4<sup>+</sup> and CD8<sup>+</sup> T cells.** Panels A, B and C show absolute number of transduced CD4<sup>+</sup>, CD8<sup>+</sup> and Sca1<sup>+</sup> cells on day 5, respectively. The data correspond to three independent experiments, and are represented as the mean ± SEM. Four asterisks represents p-value < 0.0001, calculated using a mixed logistic regression model, compared to PS for transduction level.

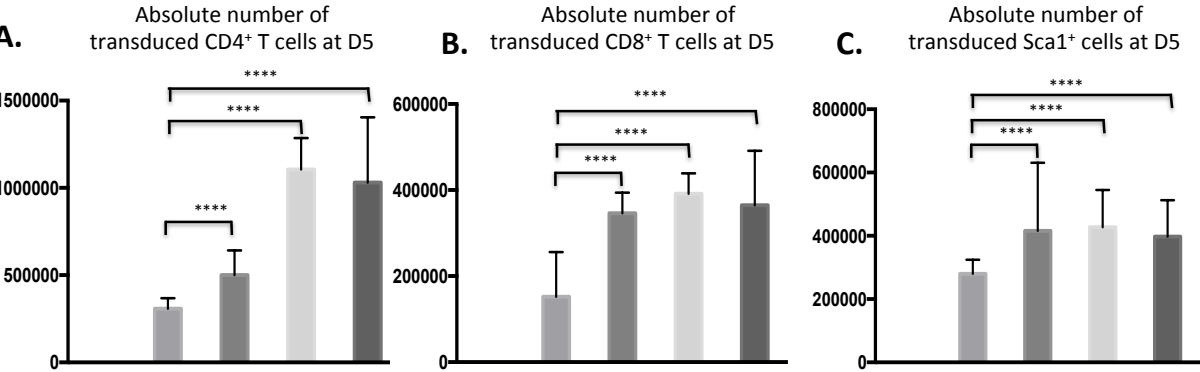

Supplement: mmc1.pdf [file mmc1.pdf]
